# Supplementary material for: Recurrence rate of cholecystitis after initial gallbladder stenting versus secondary gallbladder stenting: A propensity score matching study
Source: PubMed Central journal article supplement (PMC11670053; doi:10.1002/deo2.70047), 2024-12-26
Supplement: DEO2-5-e70047-s001.pdf [file DEO2-5-e70047-s001.pdf]

Supplementary Figure 1.

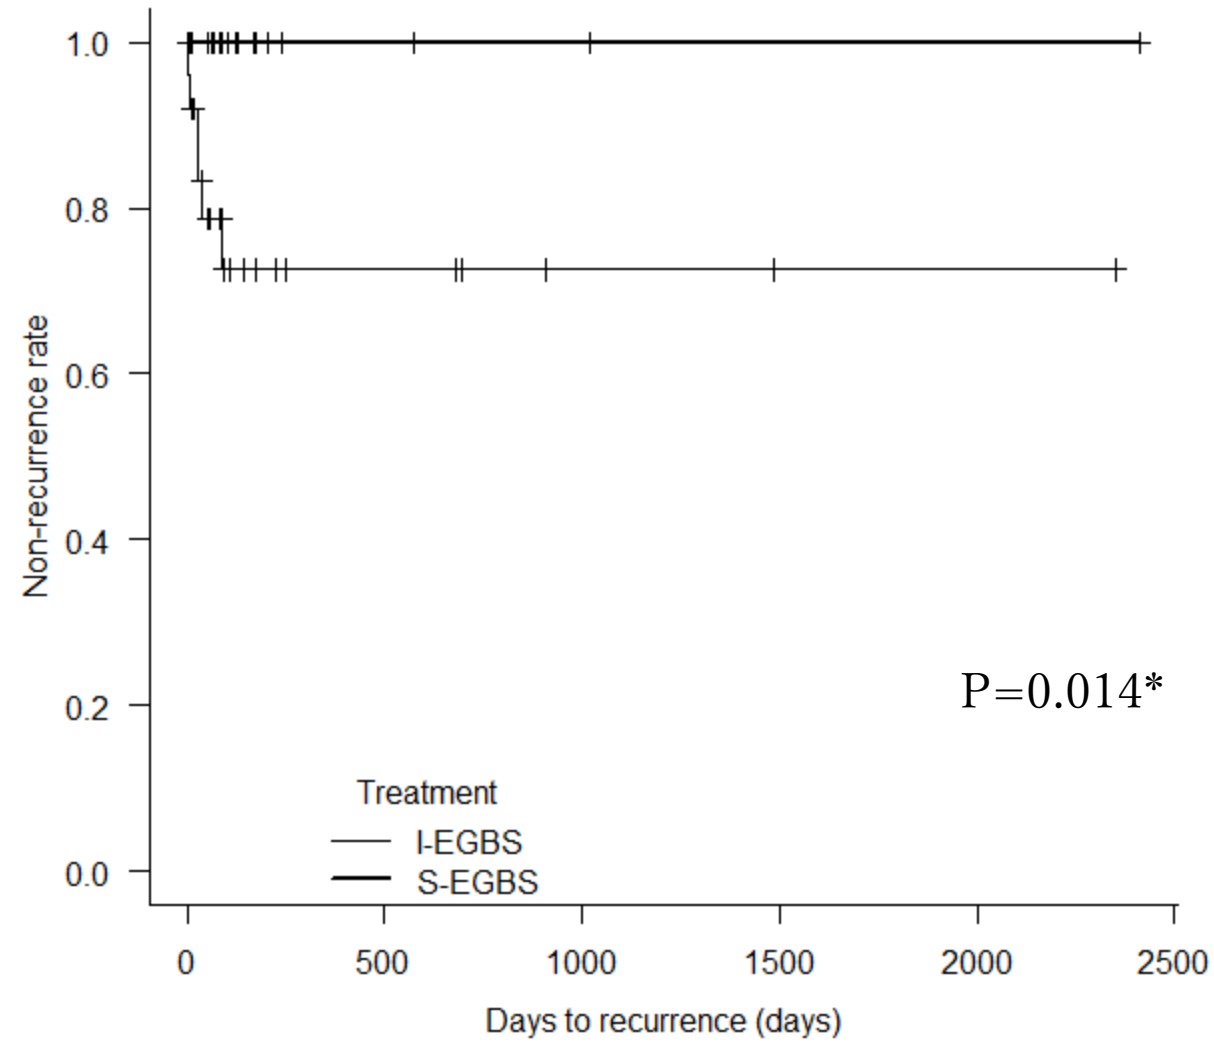

Number at risk

|        |    |   |   |   |   |   |
|--------|----|---|---|---|---|---|
| I-EGBS | 27 | 5 | 2 | 1 | 1 | 0 |
| S-EGBS | 23 | 3 | 2 | 1 | 1 | 0 |

Supplementary Figure 2.

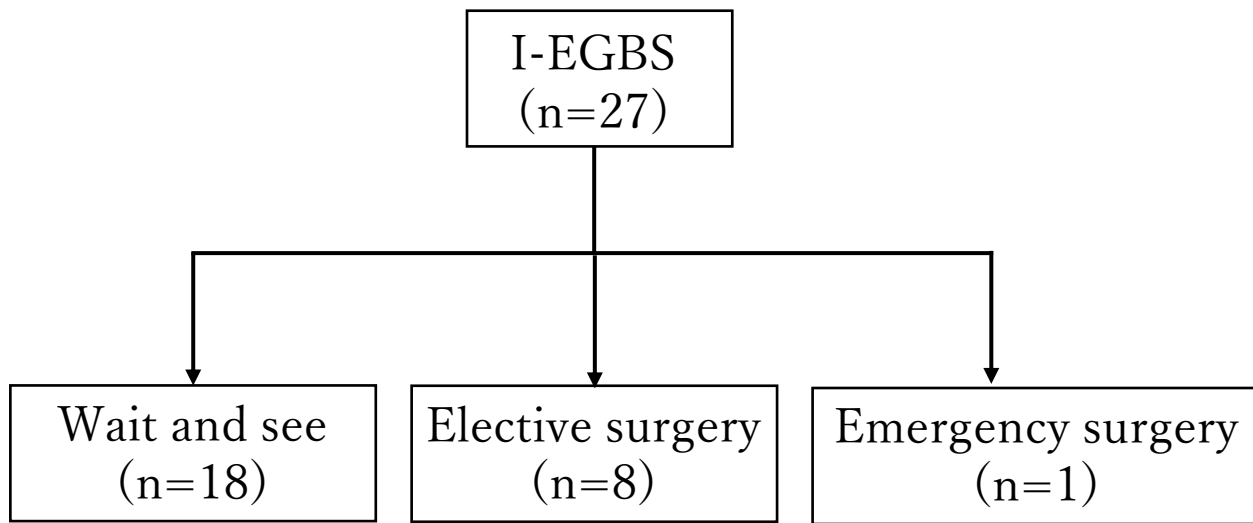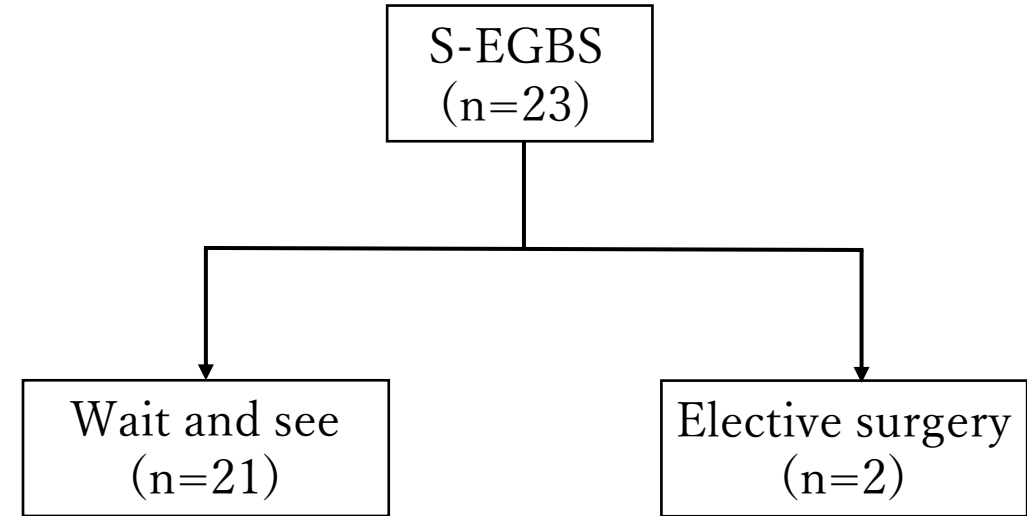

\*In the event of a recurrence
